# Supplementary material for: Unravelling the Role of Melanin in Cd and Zn Tolerance and Accumulation of Three Dark Septate Endophytic Species
Source: MDPI journal article supplement (doi:10.3390/microorganisms8040537), 2020-04-08
Supplement: s1 [file s1]

**Table S1.** Homologous proteins (with JGI ID) involved in DHN melanin synthesis identified in the genomes of *Leptodontium* sp. PMI\_412 and *Cadophora* sp. DSE1049 using proteins of *Aspergillus fumigatus* Af293 identified by blastp of the proteins presented by Tsai et al. (1999).

| DHN–melanin pathway | <i>Aspergillus fumigatus</i> |               | <i>Leptodontium</i> sp. PMI_412 | <i>Cadophora</i> sp. DSE1049                  |
|---------------------|------------------------------|---------------|---------------------------------|-----------------------------------------------|
|                     | Tsai et al. (1999) ID        | Af293 jgi  ID |                                 |                                               |
| <i>Ayg1</i>         | AAF03354.1                   | Aspfu1 3227   | Leptod1 423695                  | Cadsp1 497711                                 |
| <i>Alb1</i>         | AAC39471.1                   | Aspfu1 3230   | Leptod1 526612                  | Cadsp1 606172                                 |
| <i>Arp1</i>         | AAC49843.1                   | Aspfu1 3229   | Leptod1 516759                  | Cadsp1 648036                                 |
| <i>Arp2</i>         | AAF03314.1                   | Aspfu1 3228   | Leptod1 350316                  | Cadsp1 445556                                 |
| <i>Abr1</i>         | AAF03353.1                   | Aspfu1 3226   | Leptod1 528691                  | Cadsp1 413886                                 |
| <i>Abr2</i>         | AAF03349.1                   | Aspfu1 3225   | Leptod1 346792                  | Cadsp1 643922                                 |
|                     |                              |               |                                 | :identified by reciprocal best hit            |
|                     |                              |               |                                 | :Blastp hit, but not best reciprocal best hit |

**Table S2.** Homologous proteins (with JGI ID) involved in melanin synthesis pathways identified in the genomes of *Leptodontium* sp. PMI\_412 and *Cadophora* sp. DSE1049 using proteins of *Exophiala dermatitidis* UT8656 following Li et al. (2016).

| DHN–melanin pathway                                       | <i>Exophiala dermatitidis</i> |             | <i>Leptodontium</i> sp. PMI_412 | <i>Cadophora</i> sp. DSE1049                  |
|-----------------------------------------------------------|-------------------------------|-------------|---------------------------------|-----------------------------------------------|
|                                                           | as in Li et al. (2016)        | jgi  ID     |                                 |                                               |
| Polyketide synthase (Pks1)                                | HMPREF1120-03173              | Exode1 3244 | Leptod1 526612                  | Cadsp1 606172                                 |
| Abhydrolase ( <i>Ayg1</i> )                               | HMPREF1120-00377              | Exode1 388  | Leptod1 423695                  | Cadsp1 497711                                 |
|                                                           | HMPREF1120-02312              | Exode1 2366 | Leptod1 423695                  | Cadsp1 497711                                 |
| 1,3,6,8-Tetrahydroxynaphthalene reductase ( <i>Arp2</i> ) | HMPREF1120-05939              | Exode1 6147 | Leptod1 350316                  | Cadsp1 445556                                 |
| Scytalone dehydratase ( <i>Arp1</i> )                     | HMPREF1120-07724              | Exode1 7970 | Leptod1 380224                  | Cadsp1 557078                                 |
| Fungal pigment MCO ( <i>Abr2</i> )                        | HMPREF1120-02828              | Exode1 2890 | Leptod1 346792                  | Cadsp1 643922                                 |
|                                                           | HMPREF1120-05645              | Exode1 5845 | Leptod1 346792                  | Cadsp1 637625                                 |
| Fungal ferroxidase ( <i>Abr1</i> )                        | HMPREF1120-04510              | Exode1 4657 | Leptod1 107642                  | Cadsp1 413886                                 |
|                                                           | HMPREF1120-00173              | Exode1 177  | Leptod1 107642                  | Cadsp1 413886                                 |
|                                                           | HMPREF1120-01590              | Exode1 1625 | Leptod1 107642                  | Cadsp1 413886                                 |
|                                                           | HMPREF1120-03706              | Exode1 3803 | Leptod1 425821                  | Cadsp1 570919                                 |
|                                                           | HMPREF1120-04536              | Exode1 4683 | Leptod1 425821                  | Cadsp1 570919                                 |
| <b>DOPA–melanin pathway</b>                               |                               |             |                                 |                                               |
| Tyrosinase (melC2)                                        | HMPREF1120-05316              | Exode1 5501 | Leptod1 527785                  | Cadsp1 514369                                 |
|                                                           | HMPREF1120-03345              | Exode1 3425 | Leptod1 376758                  | Cadsp1 638399                                 |
|                                                           | HMPREF1120-04514              | Exode1 4661 | Leptod1 376758                  | Cadsp1 638399                                 |
| Laccase (Lac)                                             | HMPREF1120-05865              | Exode1 6070 | Leptod1 525353                  | Cadsp1 572856                                 |
|                                                           | HMPREF1120-00199              | Exode1 203  | Leptod1 465495                  | Cadsp1 18911                                  |
|                                                           | HMPREF1120-08116              | Exode1 8373 | Leptod1 465495                  | Cadsp1 572856                                 |
|                                                           | HMPREF1120-08564              | Exode1 8840 | Leptod1 525179                  | Cadsp1 658257                                 |
|                                                           | HMPREF1120-04578              | Exode1 4726 | Leptod1 526126                  | Cadsp1 658257                                 |
|                                                           | HMPREF1120-02754              | Exode1 2815 | Leptod1 525179                  | Cadsp1 658257                                 |
| <b>L-tyrosine degradation pathway</b>                     |                               |             |                                 |                                               |
| Tyrosine aminotransferase (Tat)                           | HMPREF1120-02164              | Exode1 2216 | Leptod1 525973                  | Cadsp1 477092                                 |
| 4-Hydroxyphenylpyruvate dioxygenase (hppD)                | HMPREF1120-05584              | Exode1 5783 | Leptod1 348899                  | Cadsp1 455878                                 |
| Homogentisate dioxygenase (hmgA)                          | HMPREF1120-03827              | Exode1 3931 | Leptod1 379107                  | Cadsp1 455878                                 |
| Fumarylacetoacetate hydrolase (fahA)                      | HMPREF1120-03825              | Exode1 3929 | Leptod1 518059                  | Cadsp1 455878                                 |
| Maleylacetoacetate isomerase (maiA)                       | HMPREF1120-03438              | Exode1 3525 | Leptod1 390379                  | Cadsp1 455878                                 |
|                                                           |                               |             |                                 | :identified by reciprocal best hit            |
|                                                           |                               |             |                                 | :Blastp hit, but not best reciprocal best hit |

**Table S3.** Effect of tricyclazole and kojic acid on fungal growth

| Strain  | Control               | Kojic acid           | Tricyclazole          | Kojic acid + Tricyclazole |
|---------|-----------------------|----------------------|-----------------------|---------------------------|
| Me07    | 100 ± 3 <sup>a</sup>  | 101 ± 6 <sup>a</sup> | 98 ± 4 <sup>a</sup>   | 97 ± 7 <sup>a</sup>       |
| Pr30    | 100 ± 2 <sup>a</sup>  | 90 ± 2 <sup>c</sup>  | 103 ± 2 <sup>a</sup>  | 97 ± 1 <sup>b</sup>       |
| Fe06    | 100 ± 2 <sup>c</sup>  | 112 ± 5 <sup>a</sup> | 101 ± 1 <sup>bc</sup> | 109 ± 4 <sup>ab</sup>     |
| DSE1049 | 100 ± 12 <sup>b</sup> | 115 ± 2 <sup>a</sup> | 112 ± 4 <sup>a</sup>  | 110 ± 2 <sup>a</sup>      |
| Va46    | 100 ± 9 <sup>a</sup>  | 107 ± 4 <sup>a</sup> | 102 ± 8 <sup>a</sup>  | 117 ± 4 <sup>a</sup>      |
| Pr29    | 100 ± 4 <sup>a</sup>  | 96 ± 4 <sup>a</sup>  | 95 ± 6 <sup>a</sup>   | 97 ± 4 <sup>a</sup>       |

Mycelia were grown for two weeks on Pachlewski medium amended with 50 µg/mL kojic acid, 10 µg/mL tricyclazole or a combination of both compounds. Values are means ± SE (n=9). Significant differences between treatments ( $P < 0.05$ , Kruskal-Wallis test) are indicated by different letters.
